# Supplementary material
Source: Springer Nature journal article supplement (https://www.springermedizin.de/resource/supplementary/12985_2010_1036_MOESM5_ESM.pdf/9609004)
Supplement: MOESM5 [file 9609004]

**Table 5: Distribution of HEGs or putative HEGs in sequenced T4-related genomes**

| Phage genome analyzed | Category and number of HEGs found |                      |                     |                |                  |                 |                               |            | Total |
|-----------------------|-----------------------------------|----------------------|---------------------|----------------|------------------|-----------------|-------------------------------|------------|-------|
|                       | <i>seg-like GIY-YIG</i>           | <i>other GIY-YIG</i> | <i>mob-like HNH</i> | <i>HNH-AP2</i> | <i>other HNH</i> | <i>hef-like</i> | <i>Intron encoded GIY-YIG</i> | <i>HNH</i> |       |
| T4                    | 7                                 |                      | 5                   |                |                  |                 | 2                             | relic      | 15    |
| T2                    |                                   |                      |                     |                | 1                |                 |                               |            | 1     |
| T6                    | 6                                 |                      | 3                   |                | 1                |                 | 1                             |            | 11    |
| RB3                   | 4                                 |                      | 2                   |                |                  |                 | 1                             | 1          | 8     |
| RB14                  | 2                                 |                      |                     |                |                  |                 |                               |            | 2     |
| RB15                  | 1                                 |                      | 1                   |                |                  |                 |                               |            | 2     |
| RB18                  | 2                                 |                      |                     |                |                  |                 |                               |            | 2     |
| RB26                  |                                   |                      |                     |                |                  |                 |                               |            | None  |
| RB32                  | 2                                 |                      | 2                   |                |                  |                 |                               |            | 4     |
| RB51 or RB70          | 2                                 |                      | 1                   |                | 1                |                 |                               |            | 4     |
| LZ2                   | 3                                 |                      |                     |                |                  |                 | 1                             |            | 4     |
| RB69                  |                                   |                      |                     |                |                  |                 |                               |            | None  |
| RB49                  |                                   |                      |                     | 1              | 1                |                 |                               |            | 2     |
| phi-1                 | 1                                 |                      |                     |                | 1                |                 |                               |            | 2     |
| JSE                   | 1                                 |                      | 2                   | 2              | 2                |                 |                               | relic?     | 7     |
| JS98                  |                                   |                      |                     |                |                  |                 |                               |            | None  |
| JS10                  |                                   |                      |                     |                |                  |                 |                               |            | None  |
| CC31                  |                                   |                      |                     |                |                  |                 |                               |            | None  |
| RB43                  |                                   |                      | 1                   | 3              |                  |                 |                               |            | 4     |
| RB16                  | 2                                 | 1                    | 1                   | 6              |                  |                 |                               |            | 10    |
| 133                   | 2                                 | 1                    | 1                   |                |                  | 1               |                               |            | 5     |
| Acj9                  | 2                                 |                      | 1                   |                | 1                | 1               |                               |            | 5     |
| Acj61                 | 3                                 |                      |                     |                |                  |                 |                               |            | 3     |
| Acc42                 | 4                                 | 1                    |                     |                |                  |                 |                               |            | 5     |
| 44RR                  |                                   |                      |                     |                |                  |                 |                               |            | None  |
| 31                    |                                   |                      |                     |                |                  |                 |                               |            | None  |
| 25                    | 2                                 |                      | 1                   |                | 1                |                 |                               |            | 4     |

|                                                        |   |        |   |   |   |  |  |  |                                |
|--------------------------------------------------------|---|--------|---|---|---|--|--|--|--------------------------------|
| <b>Aeh1<br/>PX29</b>                                   | 2 |        | 1 |   |   |  |  |  | 1<br>2                         |
| <b>65</b>                                              |   |        | 1 |   |   |  |  |  | 1                              |
| <b>KVP40<br/>nt-1</b>                                  | 1 | 1      |   |   |   |  |  |  | 1<br>1                         |
| <b>S-PM2<br/>S-RSM4<br/>Syn9<br/>P-SSM2<br/>P-SSM4</b> |   | 1<br>1 |   |   |   |  |  |  | None<br>None<br>1<br>1<br>None |
| <b>KP15</b>                                            | 1 |        |   | 1 |   |  |  |  |                                |
| <b>W-14</b>                                            |   |        |   |   | 1 |  |  |  | 1                              |
| <b>Sbo-AG3</b>                                         |   |        | 2 |   |   |  |  |  | 2                              |

Table 5
